# Supplementary material
Source: PubMed Central journal article supplement (PMC3102361)
Supplement: 1017042108_pnas.1017042108_SI.pdf [file 1017042108_pnas.1017042108_SI.pdf]

# Supporting Information

Zarpellon et al. 10.1073/pnas.1017042108

## SI Methods.

**Expression, Purification, and Characterization of GPIb $\alpha$ -N.** The full-length human TPST-2 cDNA coexpressed with the cDNA coding for the human GPIb $\alpha$  fragment -2 to 290 with the Cys<sup>65</sup> → Ala substitution was cloned into the *Drosophila melanogaster* expression vector pMT/BiP/V5-HisA (Invitrogen, Carlsbad, CA). Site-directed mutagenesis for expressing mutant GPIb $\alpha$ -N, including all Tyr → Phe substitutions, was performed by polymerase chain reaction using oligonucleotide primers containing the desired mutation(s) (QuickChange Site-Directed Mutagenesis Kit, Stratagene, La Jolla, CA). All GPIb $\alpha$ -N species were purified by ion exchange and gel permeation chromatography. To demonstrate differences in sulfate content, duplicate 40 to 100  $\mu$ g aliquots of each species were equilibrated with 0.05 M sodium acetate, pH 5.5; one was mixed with 60  $\mu$ g of abalone sulfatase (type VIII; Sigma-Aldrich Co., St. Louis, MO) and both were placed in a heating block at 37°C. After various incubation times, the reaction was stopped by placing the tubes on ice for 30 min followed by dilution in phosphate-buffered saline. Sulfate removal was analyzed by comparative ion exchange chromatography and isoelectric focusing; the latter was performed with 5  $\mu$ g of protein in 5% polyacrylamide-2% ampholytes (pH 3–10) applying 100 V for 1 h, 200 V for 1 h, and 500 V for 30 min. Gels were then fixed and proteins stained with Coomassie Blue.

**Crystallization of the Complex of Fully Sulfated GPIb $\alpha$ -N with FIIa.** Human FIIa was treated with a 25-fold molar excess of PPACK (both from Haematologic Technologies) for eight hours at 22–25°C and three days at 4°C. Catalytically blocked FIIa was separated from free inhibitor by gel permeation chromatography (GPC) on a PD10 column (GE Healthcare, Buckinghamshire, United Kingdom) equilibrated with a buffer composed of 20 mM Hepes, 135 mM NaCl, pH 7.4 [Hepes-buffered saline, (HBS)]. Residual proteolytic activity was assessed from the clotting time of a 4 mg/mL fibrinogen solution mixed with 0.1 mg/mL P-FIIa in the presence of 2 mM CaCl<sub>2</sub>; it was less than 1:1,000,000 of that of untreated FIIa. The complex of GPIb $\alpha$ -N with three Tys residues and P-FIIa was obtained and crystallized as described (1). In brief, the two proteins were mixed at 1:1 molar ratio and the resulting complex was purified by GPC, concentrated to 20 mg/mL in HBS, and crystallized by the hanging drop technique mixing 1  $\mu$ L of protein solution and 1  $\mu$ L of reservoir solution containing 16% PEG 600 and 200 mM ammonium phosphate, pH 7.0. The crystals were first characterized using an R-axis 1V++ image plate detector (Rigaku Corp, Tokyo, Japan); diffraction data to 3.2 Å resolution were collected at the Stanford Synchrotron Radiation Lightsource on beam lines 9-2.

**Preparation of Chimeric GPIb $\alpha$ -N-Long.** To check if FIIa binding to surface-anchored GPIb $\alpha$ -N is affected by the spatial orientation of the molecule relative to the surface, we used a recombinant chimeric protein formed by residues -2 to 288 of GPIb $\alpha$  followed by 132 residues of the SV40 large T antigen; this molecule was designated GPIb $\alpha$ -N-Long. We generated a monoclonal antibody (LJ-3A2) that reacted specifically with the extended SV40 sequence and not with GPIb $\alpha$ -N; this was used in experiments based on receptor immobilization as an alternative to using LJ-P3 specific for an epitope located in the NH<sub>2</sub>-terminal region of GPIb $\alpha$ -N.

**Evaluation of FIIa Binding to GPIb $\alpha$ -N by Complex Formation in Solution and by SPR.** To measure the amount of soluble complex

formed, different GPIb $\alpha$ -N species and P-FIIa were mixed in a 3:1 mass ratio and incubated at 37°C for 30 min. The components of the mixtures were then separated by GPC using two high performance liquid chromatography (HPLC) Superdex columns in series, the first packed with S75 and the second with S200 (GE Healthcare). As a reference, corresponding amounts of the individual complex components were analyzed under the same conditions. Fractions were collected and analyzed for GPIb $\alpha$ -N and P-FIIa content by reversed-phase HPLC, using a 0.2 × 11 cm column packed with 10  $\mu$ m Poros RH-1 beads (Applied Biosystems, Foster, CA) and, as the eluant, a gradient starting with 0.1% trifluoroacetic acid in Milli-Q (Milliford, MA) water and ending with 0.1% trifluoroacetic acid in acetonitrile (Fisher Optima, NJ); light absorbance of the effluent was measured at 215 nm and plotted against elution time. Known amounts of purified GPIb $\alpha$ -N and P-FIIa were analyzed individually using the same procedure, and the relation between known protein mass and area under the corresponding absorption peak provided the calibration to measure unknown quantities of the same protein. The fractions containing P-FIIa bound to GPIb $\alpha$ -N or control P-FIIa not incubated with GPIb $\alpha$ -N did not overlap; thus, the amount of complex formed was expressed as percent P-FIIa present in the former relative to the amount present in the latter. With the excess GPIb $\alpha$ -N used, typically >95% P-FIIa was in the complex fractions.

To generate SPR sensorgrams, GPIb $\alpha$ -N was diluted in HBS containing 3 mM EDTA and 0.005% P20 surfactant (HBS-EP), and injected over one of the chip flow cells to which the antibody LJ-P3 was covalently bound. Injection at a flow rate of 40  $\mu$ L/min continued until the desired ligand concentration at the chip surface (measured in Biacore Units, RU; 1 RU = 1 × 10<sup>-6</sup> Refractive Index Units) was reached. P-FIIa diluted in HBS-EP (concentration range 3.125–10,000 nM) was then injected over the flow cell with bound GPIb $\alpha$  and a control cell where only LJ-P3 was on the surface (nonspecific binding). Association was followed for 3 min, after which HBS-EP was injected for 5 min to assess dissociation. Two 1-min pulses of 3.2 mM NaOH, pH 11.5, were injected at 60  $\mu$ L/min to detach LJ-P3-bound GPIb $\alpha$ -N before reusing the chip. Binding at saturation ( $B_{\max}$ ) and equilibrium dissociation constant ( $K_D$ , binding affinity) were obtained by nonlinear fitting of specific binding ( $\Delta$ RU, the difference in P-FIIa RU on the surface with and without immobilized GPIb $\alpha$ -N at equilibrium) as a function of P-FIIa concentration; a one-site model of interaction yielded consistently the best fitting (GraphPad Prism version 5.0; GraphPad Software, San Diego, CA).  $B_{\max}$  was reported as molar ratio of bound P-FIIa and GPIb $\alpha$ -N immobilized onto the chip, the latter calculated with the assumption that 1 RU measured by SPR corresponds to 1 pg of protein/mm<sup>2</sup> of surface. To derive the kinetics rate constants, we assumed that the dissociation phase followed an exponential model and derived the dissociation rate constant (off-rate,  $k_d$ ) by nonlinear regression fitting of the experimental data using the equation:

$$B_t = NS + (B_0 - NS) \cdot e^{-k_d t} \quad [S1]$$

Where  $t$  is time,  $B_t$  is observed binding at time =  $t$ , NS is nonspecific binding, and  $B_0$  is total binding at time = 0 (before dissociation begins). Then, the association rate constant (on-rate,  $k_a$ ) was obtained by nonlinear regression fitting of the association data using the equation:

$$B_t = B_{Eq} \cdot (1 - e^{-k_{ob} \cdot t}) \quad [S2]$$

Where  $B_t$  is binding at time =  $t$ ,  $B_{Eq}$  is maximum (equilibrium) binding measured at any given analyte concentration, and  $k_{ob}$  (expressed in units of inverse time) is a constant expressing how quickly binding reaches equilibrium; then,  $k_d$  was derived from  $k_{ob}$  using the equation:

$$k_d = (k_{ob} - k_a) / [\text{Analyte}] \quad [S3]$$

Where  $k_d$  is the calculated dissociation rate constant.

**FIIa Binding to Platelets.** Following an institutionally approved protocol, human blood was obtained from healthy donors who gave their informed consent according to the Declaration of Helsinki. Blood (five parts) collected in acid-citrate-dextrose (1 part; 71 mM citric acid, 85 mM sodium citrate, 111 mM dextrose, pH 4.5) was centrifuged at 600 g for 12 min to prepare platelet-rich plasma. A platelet pellet was then obtained by centrifuging platelet-rich plasma at 800 g for 15 min in the presence of 10 mM PG  $E_1$  (Enzo Life sciences, Farmingdale, NY) and 0.6 U/mL Apyrase Grade VII (Sigma). The pellet was washed once by resuspension and centrifugation in modified Tyrode buffer, pH 6.5 (135 mM sodium chloride, 2.9 mM magnesium chloride, 1 mM sodium phosphate monobasic, 10 mM Hepes, 2.5 mM dextrose), and finally resuspended in the same buffer but at pH 7.4; the platelet count was adjusted to  $2 \cdot 10^7$ /mL. For these assays, FIIa was blocked in the active site with biotin-PPACK (B-P-FIIa; Haematologic Technologies) and characterized as described above for P-FIIa. In initial assays, B-P-FIIa was added at the desired concentration (maximum 800 nM) into aliquots of the platelet suspension and incubated for the indicated time at room temperature (22–25 °C), followed by phycoerythrin-conjugated

streptavidin (S-PE; Invitrogen; 1.25  $\mu$ g/mL) for 5 min; in subsequent experiments (see Fig. S5C), B-P-FIIa and S-PE were mixed at a fixed molar ratio (4:1) before addition to platelets. The two methods gave similar results, but the latter was more reproducible and was used for evaluating the time-course of binding. When indicated, the anti-GPIb $\alpha$  monoclonal antibody, LJ-Ib10 (2), which specifically inhibits FIIa binding (3), was added to the platelet suspension five minutes before the addition of S-PE/B-P-FIIa. Binding was measured by flow-cytometry, without sample dilution, using a FACS Calibur II equipped with a 488 nm argon laser and the software CellQuest for data evaluation (Becton Dickinson and Company, Franklin Lakes, NJ). Results were expressed as geometric mean of the fluorescence intensity of 10,000 events and analyzed with GraphPad Prism version 5.0.

**Additional Materials Used in Supporting Experiments.** In addition to DNA aptamers, we used other FIIa exosite inhibitors to evaluate their effect on binding to GPIb $\alpha$ . Lepirudin (recombinant [Leu<sup>1</sup>-Thr<sup>2</sup>]-63-desulfohirudin; Repludan; Bayer Corp., Pharmaceutical Div., West Haven, CT) and hirugen (synthetic 3-O-sulfo-Tyr<sup>63</sup>-hirudin [54–65]; Anaspec, Fremont, CA) were used to block exosite I; heparin (sodium salt, Grade II, from porcine intestinal mucosa; Sigma-Aldrich Co., St. Louis, MO) to block exosite II. Alexa Fluor 488-conjugated streptavidin was from Invitrogen, Carlsbad, CA.

**Evaluation of Results Obtained with Inhibitors of FIIa Binding to GPIb $\alpha$ .** The inhibition constants ( $K_i$ ) of FIIa exosite inhibitors were calculated according to the Cheng-Prusoff equation (4) from the corresponding  $IC_{50}$  values derived from inhibition dose-response curves fitted with GraphPad Prism (version 5.0; GraphPad Software, San Diego, CA). Results were expressed as mean  $\pm$  SEM of at least two independent determinations.

1. Celikel R, et al. (2003) Modulation of  $\alpha$ -thrombin function by distinct interactions with platelet glycoprotein Ib $\alpha$ . *Science* 301:218–221.
2. Handa M, Titani K, Holland LZ, Roberts JR, Ruggeri ZM (1986) The von Willebrand factor-binding domain of platelet membrane glycoprotein Ib. Characterization by monoclonal antibodies and partial amino acid sequence analysis of proteolytic fragments. *J Biol Chem* 261:12579–12585.
3. De Marco L, Mazzucato M, Masotti A, Fenton JW, II, Ruggeri ZM (1991) Function of glycoprotein Ib $\alpha$  in platelet activation induced by  $\alpha$ -thrombin. *J Biol Chem* 266:23776–23783.
4. Cheng Y, Prusoff WH (1973) Relationship between the inhibition constant ( $K_i$ ) and the concentration of inhibitor which causes 50 per cent inhibition ( $i_{50}$ ) of an enzymatic reaction. *Biochem Pharmacol* 22:3099–3108.

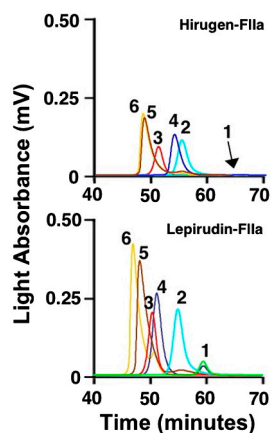

**Fig. S1.** Exosite I-specific ligands fail to inhibit P-FIIa binding to soluble GPIb $\alpha$ -N. Top. Elution time from a GPC column of P-FIIa (peak 2); wild type GPIb $\alpha$ -N (peak 3); P-FIIa plus hirugen (8-fold molar excess; peak 4); P-FIIa plus GPIb $\alpha$ -N (peak 5); and hirugen plus P-FIIa plus GPIb $\alpha$ -N (peak 6). Mixtures yielding new peaks eluting earlier than individual components indicates complex formation in solution. Note that hirugen alone (peak 1) has no significant absorption under these experimental conditions. Bottom. The same as above, but using lepirudin (peak 1) instead of hirugen and FIIa instead of P-FIIa; lepirudin has a larger molecular mass than hirugen, thus the positional shift of peak 6 as compared to peak 5 is more evident.
